# Supplementary material for: Prevalence of Helicobacter pylori infection and antibiotic resistance profile in Armenia
Source: Gut Pathog. 2019 Jun 8;11:28. doi: 10.1186/s13099-019-0310-0 (PMC6555938; doi:10.1186/s13099-019-0310-0)
Supplement: Supplementary file 2 — Additional file 2. Contains all data on macrolide and fluoroquinolone resistance mutation testing in gastric biopsy specimens of 91 patients. [file 13099_2019_310_MOESM2_ESM.xlsx]

## Sheet: resultats
Biopsies from Armenia - H. pylori PCR
No Sample	H. pylori PCR	Macrolides mutation	Macrolides	Fluoroquinolones
1	Positive	Wild Type	Sensitive	no mutation
2	Negative
3	Positive	Wild Type	Sensitive	no mutation
4	Positive	A2142-3G	Resistant	no mutation
5	Negative
6	Positive	Wild Type	Sensitive
7	Positive	Wild Type	Sensitive	no mutation
8	Negative
9	Positive	Wild Type	Sensitive	A97V (sensitive)
10	Positive	Wild Type	Sensitive
11	Positive	Wild Type	Sensitive	no mutation
12	Positive	Wild Type	Sensitive	no mutation
13	Positive	Wild Type	Sensitive	N87K
14	Positive	Wild Type	Sensitive	no mutation
15	Positive	Wild Type	Sensitive
16	Positive	Wild Type	Sensitive	N87K
17	Positive	Wild Type	Sensitive	no mutation
18	Positive	Wild Type	Sensitive	no mutation
19	Positive	Wild Type	Sensitive	D91Y
20	Positive	Wild Type	Sensitive	no mutation
21	Positive	Wild Type	Sensitive	no mutation
22	Positive	Wild Type	Sensitive	no mutation
23	Negative
24	Negative
25	Negative
26	Positive	Wild Type	Sensitive	no mutation
27	Positive	Wild Type	Sensitive	no mutation
28	Positive	Wild Type	Sensitive	A97V (sensitive)
29	Negative
30	Negative
31	Positive	Wild Type	Sensitive	N87K
1	Positive	Wild Type	Sensitive	no mutation
2	Negative
3	Negative
6001	Negative
6002	Negative
6003	Positive	Wild Type	Sensitive
6004	Negative
6005	Negative
6006	Negative
6007	Negative
6009	Positive	Wild Type	Sensitive	no mutation
7001	Positive	Wild Type	Sensitive	no mutation
7002	Negative
7003	Positive	Wild Type	Sensitive	no mutation
7004	Positive	Wild Type	Sensitive	no mutation
7005	Negative
7006	Negative
7007	Positive	Wild Type	Sensitive	no mutation
7008	Negative
7009	Positive	Wild Type	Sensitive	no mutation
7010	Positive	Wild Type	Sensitive	no mutation
7011	Negative
7012	Positive	Wild Type	Sensitive	no mutation
7013	Negative
7014	Negative
7015	Negative
7016	Negative
7017	Positive	Wild Type	Sensitive	no mutation
7018	Positive	Wild Type	Sensitive
7019	Positive	Wild Type	Sensitive	no mutation
7020	Negative
7021	Negative
7022	Positive	Wild Type	Sensitive	no mutation
7023	Positive	Wild Type	Sensitive	no mutation
7024	Positive	Wild Type	Sensitive	no mutation
7025	Negative
7026	Negative
7027	Positive	Wild Type	Sensitive
7028	Negative
7029	Positive	Wild Type	Sensitive	no mutation
7030	Positive	Wild Type	Sensitive
7031	Negative
7032	Negative
7033	Positive	Wild Type	Sensitive	no mutation
7034	Positive	Wild Type	Sensitive	no mutation
7035	Positive	Wild Type	Sensitive	no mutation
7036	Negative
7037	Positive	Wild Type	Sensitive	no mutation
7038	Positive	Wild Type	Sensitive	no mutation
7039	Negative
7040	Negative
7041	Positive	Wild Type	Sensitive	N87K
7042	Negative
7043	Positive	Wild Type	Sensitive	no mutation
7044	Positive	Wild Type + A2142-3G	Resistant	no mutation
7045	Positive	Wild Type	Sensitive
7046	Positive	Wild Type	Sensitive	A97V (sensitive)
7047	Positive	Wild Type	Sensitive	no mutation
7048	Positive	Wild Type	Sensitive	D91Y
7049	Positive	Wild Type	Sensitive	no mutation

## Sheet: Stat
Biopsies from Armenia - Prevalence of H. pylori
2018-04-01
H. pylori		n=	%
	Positive	55	60.4396
	Negative	36	39.5604
	total	91
Macrolides		n=	%
	Sensitive	53	96.3636
	Resistant	2	3.63636
	total	55
Fluoroquinolones		n=	%
	Sensitive	41	87.234
	Resistant	6	12.766
	total	47*
*not 55, because for 8 samples, negative PCR (conventional PCR, less sensitive than RT-PCR)

## Sheet: cancer
Globocan 2018
Gastric cancer	Crude	ASR
Armenia	20.2	11.6
Japan	90.8	27.5
China	32.1	20.7
USA	27.6	17.2
